# Supplementary material for: Chemosensing Test Paper Based on Aggregated Nanoparticles of a Barbituric Acid Derivative
Source: Hindawi journal article supplement (doi:10.1155/2020/7826231), 2020-08-01
Supplement: f1 [file 7826231.f1.pdf]

# **Chemosensing Test Paper Based on Aggregated Nanoparticles of a Barbituric Acid Derivative**

Jinzhen Xu<sup>1</sup>, Hanjun Zhang<sup>1</sup>, Zhen Xu<sup>1</sup>, Furong Tao<sup>1</sup>, Yuezhi Cui<sup>1\*</sup>

and William W. Yu<sup>2\*</sup>

School of Chemical and Pharmaceutical Engineering, Qilu University of Technology  
(Shandong Academy of Sciences), Jinan 250353, China

Tel: +86 531 89631208; Fax: +86 531 89631760;

E-mail address: yuezhicui@163.com

$^1\text{H}$  NMR (400 MHz, Chloroform-*d*)  $\delta$  8.35 (s, 1H), 8.14 (d,  $J$  = 8.8 Hz, 2H), 7.36 (t,  $J$  = 7.8 Hz, 4H), 7.21 (d,  $J$  = 7.6 Hz, 6H), 6.95 (d,  $J$  = 8.7 Hz, 2H), 4.74 (dd,  $J$  = 14.0, 10.5 Hz, 2H), 2.37 (q,  $J$  = 12.5 Hz, 4H), 1.84 (s, 3H), 1.67 (s, 4H), 1.42 – 1.33 (m, 4H), 1.31 – 1.22 (m, 3H).

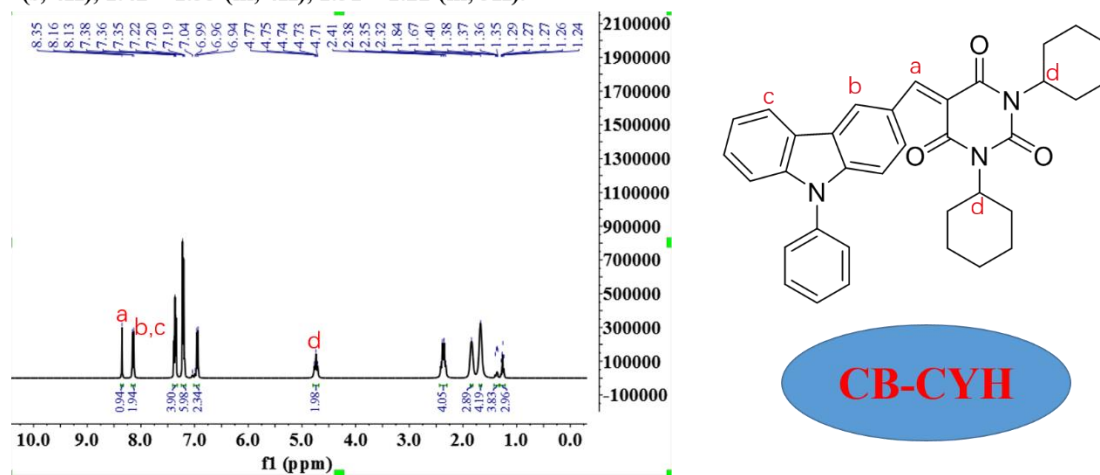

Fig. S1.  $^1\text{H}$  NMR of **CB-CYH** in Chloroform-*d*

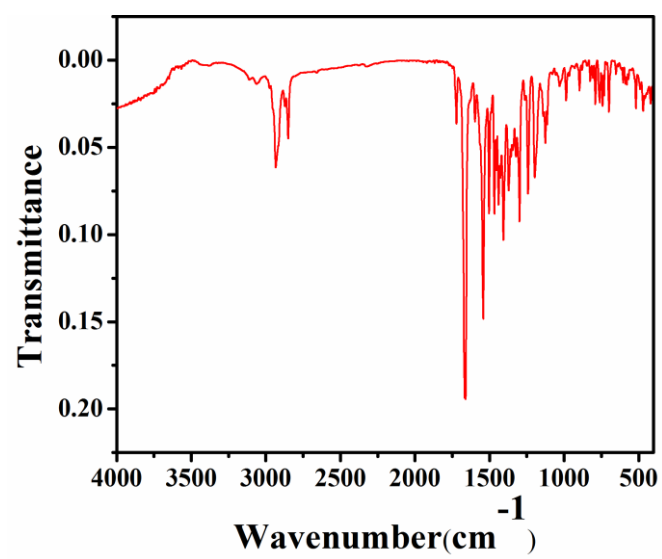

Fig. S2. FT-IR spectra of **CB-CYH**

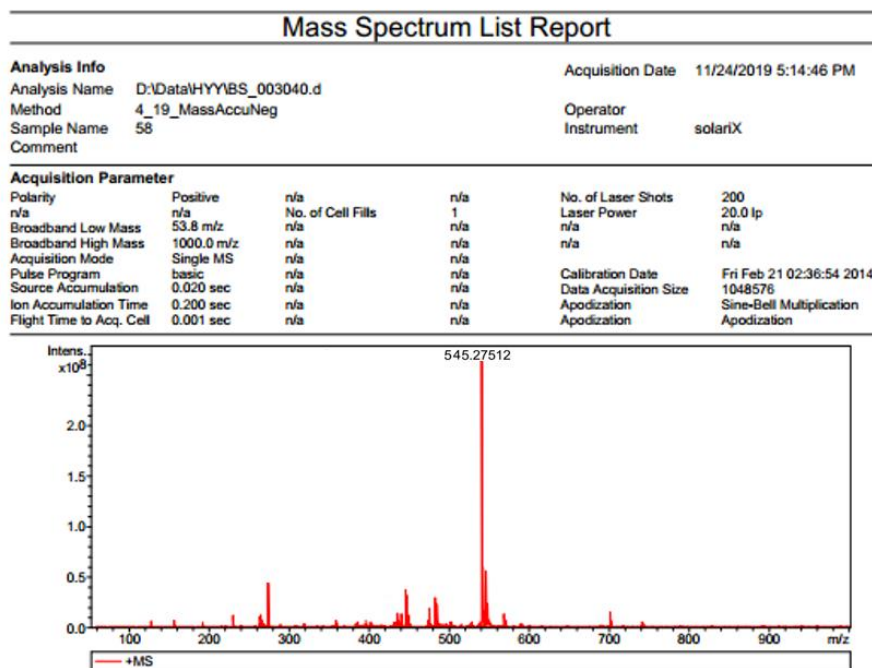

Fig. S3. HRMS spectra of **CB-CYH**

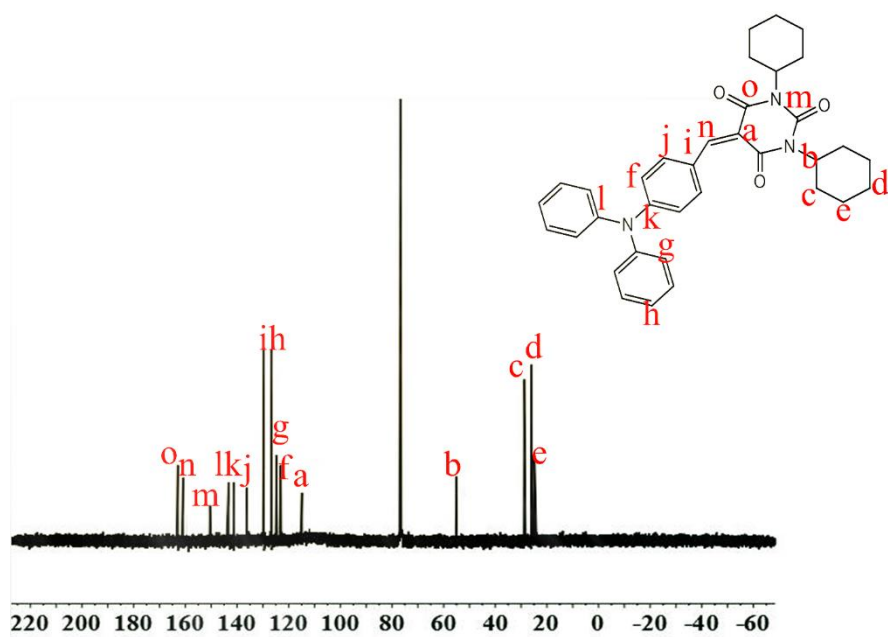

Fig. S4.  $^{13}\text{C}$  NMR of CB-CYH in  $\text{Chloroform-}d$ .

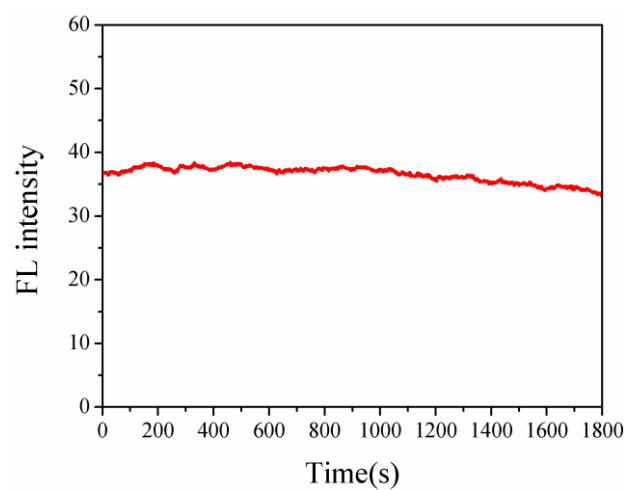

Fig. S5. CB-CYH light stability in nano-aggregates state.

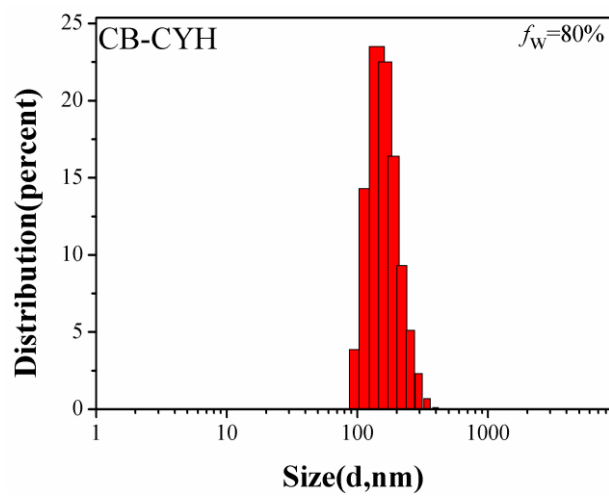

Fig. S6. Particle size distribution histograms of **CB-CYH** in a THF/H<sub>2</sub>O mixture ( $f_w = 80\%$ ) was left at room temperature for half an hour (Solution concentration:  $10^{-4}\text{M}$ ).
